# Supplementary material
Source: MDPI journal article supplement (https://www.mdpi.com/2072-4292/16/4/627)
Supplement: s1 [file s1]

*Supplementary*

# **Review of Satellite Remote Sensing and Unoccupied Aircraft Systems for Counting Wildlife on Land**

**Marie R. G. Attard <sup>1</sup>, Richard A. Phillips <sup>1</sup>, Ellen Bowler <sup>1</sup>, Penny J. Clarke <sup>1,2</sup>, Hannah Cubaynes <sup>1</sup>, David W. Johnston <sup>3</sup> and Peter T. Fretwell <sup>1,\*</sup>**

<sup>1</sup> British Antarctic Survey, Natural Environment Research Council, High Cross, Madingley Road, Cambridge CB3 0ET, UK; maratt@bas.ac.uk (M.R.G.A.); raphil@bas.ac.uk (R.A.P.); eller@bas.ac.uk (E.B.); penark38@bas.ac.uk (P.J.C.); hanbay24@bas.ac.uk (H.C.)

<sup>2</sup> School of Engineering, The University of Edinburgh, Sanderson Building, Robert Stevenson Road, The King's Buildings, Edinburgh EH9 3FB, UK

<sup>3</sup> Division of Marine Science and Conservation, Nicholas School of the Environment, Duke University Marine Laboratory, 135 Duke Marine Lab Road, Beaufort, NC 28516, USA; david.johnston@duke.edu

\* Correspondence: ptf@bas.ac.uk

**Table S1.** Commercial high-resolution satellites that can detect objects less than one metre. Image resolution is measured as Ground Sampling Distance (GSD), the distance between two consecutive pixel centres measured on the ground in metres. The information was collated in November 2023 using the ESA eoPortal [133], CEOS database [134], OSCAR database [135], Satellite Imaging Corporation database [136] or through direct correspondence with the provider. The launch date, mission status in 2023, and expected end of life (EOL) is reported, including EOL to be determined (TBD). Mission status is classified as planned (upcoming launch planned), operational (all systems fully working), and decommissioned (no longer functional).

| Provider                                                                  | Sensor                     | Launch date                                                                                                 | Mission status                             | End of Life (EOL) | Image bands                                                       | Panchromatic mode GSD | Multispectral mode GSD                   |
|---------------------------------------------------------------------------|----------------------------|-------------------------------------------------------------------------------------------------------------|--------------------------------------------|-------------------|-------------------------------------------------------------------|-----------------------|------------------------------------------|
| Airbus, European                                                          | Pléiades-1A                | 17 December 2011                                                                                            | Operational (extended)                     | December 2024     | Panchromatic, Multispectral bands (RGB, NIR)                      | 50 cm                 | 200 cm                                   |
|                                                                           | Pléiades-1B                | 2 December 2012                                                                                             | Operational (extended)                     | December 2024     | Panchromatic, Multispectral bands (RGB, NIR)                      | 50 cm                 | 200 cm                                   |
|                                                                           | Pléiades Neo               | 28 April 2021                                                                                               | Operational. Mission lifetime of >10 years | TBD               | Panchromatic, Multispectral bands (RGB, NIR, Red Edge, Deep Blue) | 30 cm                 | 120 cm                                   |
| Beijing Space View Tech Co Ltd/Space View, China                          | * SuperView-1 / GaoJing-1  | 28 December 2016 (SuperView-1 01 and SuperView-1 02) and 9 January 2018 (SuperView-1 04 and SuperView-1 06) | Operational. Mission lifetime of 8 years   | ≥2023             | Panchromatic, Multispectral bands (RGB, NIR)                      | 50 cm                 | 200 cm                                   |
| Korea Aerospace Research Institute (Provider is Satrec Initiative), Korea | KOMPSAT 3 / Arirang-3      | 17 May 2012                                                                                                 | Operational (extended)                     | May 2024          | Panchromatic, Multispectral bands (RGB, NIR)                      | 50-70cm               | 220-280 cm                               |
|                                                                           | KOMPSAT 3A / Arirang-3A    | 25 March 2015                                                                                               | Operational (extended)                     | December 2023     | Panchromatic, Multispectral bands (RGB, NIR)                      | 50-70 cm              | 220-280 cm                               |
| Maxar, United States                                                      | IKONOS (formally IKONOS-2) | 24 September 1999                                                                                           | Decommissioned                             | 31 March 2015     | Panchromatic, Multispectral bands (RGB, NIR)                      | 80 cm                 | 320 cm                                   |
|                                                                           | QuickBird-2                | 18 October 2001                                                                                             | Decommissioned                             | 17 December 2014  | Panchromatic, Multispectral bands (RGB, NIR)                      | 61 cm                 | 244 cm (at 450 km) to 163 cm (at 300 km) |
|                                                                           | WorldView-4                | 11 November 2016                                                                                            | Decommissioned                             | 7 January 2019    | Panchromatic, Multispectral bands (RGB, NIR)                      | 31 cm                 | 124 cm                                   |
|                                                                           | WorldView-1                | 18 September 2007                                                                                           | Operational (nominal)                      | September 2023    | Panchromatic                                                      | 50-55 cm              |                                          |

|                                                        |                                     |                                       |                                                                                    |                     |                                                                             |                                                              |                                                                                     |
|--------------------------------------------------------|-------------------------------------|---------------------------------------|------------------------------------------------------------------------------------|---------------------|-----------------------------------------------------------------------------|--------------------------------------------------------------|-------------------------------------------------------------------------------------|
|                                                        | GeoEye-1<br>(formally<br>OrbView-5) | 6 September 2008                      | Operational<br>(extended)                                                          | 6 September<br>2023 | Panchromatic, Multispectral<br>bands (RGB, NIR)                             | 41 cm                                                        | 164 cm                                                                              |
|                                                        | WorldView-2                         | 8 Oct 2009                            | Operational<br>(nominal)                                                           | 31 December<br>2022 | Panchromatic, Multispectral<br>bands (RGB, NIR and 4<br>additional colours) | 46 cm                                                        | 180 cm                                                                              |
|                                                        | WorldView-3                         | 13 August 2014                        | Operational<br>(nominal)                                                           | TBD                 | Panchromatic, Multispectral<br>bands (8) in VNIR (Visible<br>Near Infrared) | 31 cm                                                        | 124 cm (8<br>NVIR<br>bands), 370<br>cm (8 SWIR<br>bands), 30<br>cm (CAVIS<br>bands) |
| Mohammed Bin<br>Rashid Space<br>Centre (MBRSC),<br>UAE | KhalifaSat/<br>DubaiSat-3           | 29 October 2018                       | Operational<br>(nominal)                                                           | October 2023        | Panchromatic, Multispectral<br>bands (RGB, NIR)                             | 70 cm                                                        | 298 cm                                                                              |
| Planet                                                 | † SKYSAT                            | 21 November 2013<br>to 18 August 2020 | Operational<br>(nominal)                                                           | TBD                 | Panchromatic, Multispectral<br>(RGB, NIR)                                   | 50 cm<br>(orthorectified); 86 cm<br>(original<br>resolution) | 100 cm                                                                              |
| Satrec Initiative (SI<br>Imaging Services)             | KOMPSAT-6                           | Expected launch<br>August 2024        | Planned. Mission<br>lifetime of 5 years                                            | October 2029        | Panchromatic, Multispectral<br>bands (RGB, NIR)                             | 50 cm                                                        | 300 cm                                                                              |
|                                                        | KOMPSAT-7 /<br>Arirang 7            | Expected launch<br>September 2024     | Planned. Mission<br>lifetime of 5 years                                            | September<br>2029   | Panchromatic, Multispectral<br>bands (RGB, NIR)                             | 30 cm                                                        | 120 cm                                                                              |
|                                                        | KOMPSAT-7A<br>/ Arirang-7A          | Expected launch<br>September 2025     | Planned. Mission<br>lifetime of 5 years                                            | September<br>2030   | Panchromatic, Multispectral<br>bands (RGB, NIR)                             | 30 cm                                                        | 120 cm                                                                              |
|                                                        | SpaceEye-T                          | Expected launch<br>early 2024         | Planned. Mission<br>lifetime of 5 years,<br>with potential to<br>extend to 7 years | TBD                 | Panchromatic, Multispectral<br>bands (4)                                    | 30 cm                                                        | 120 cm                                                                              |
|                                                        | SpaceEye-X                          | Launch date TBD                       | Planned                                                                            | TBD                 | Panchromatic, Multispectral<br>bands (4)                                    | 50 cm                                                        | 200 cm                                                                              |
|                                                        | SpaceEye-M                          | Launch date TBD                       | Planned                                                                            | TBD                 | Panchromatic, Multispectral<br>bands (4)                                    | 80 cm                                                        | 320 cm                                                                              |

\* SuperView-1 (also known as GaoJing-1) is a constellation of four commercial remote sensing satellites. These are SuperView-1 01 / GaoJing-1 01, SuperView-1 02 / GaoJing-1 02, SuperView-1 04 / GaoJing-1 03 and SuperView-1 06 / GaoJing-1 05.

† SKYSAT is a constellation of 21 commercial high-resolution remote sensing satellites.

**Table S2.** Commercial synthetic-aperture radar (SAR) satellites that can detect objects smaller than one metre. The information was collated in November 2023 from multiple sources [133,134,137-143]. Image resolution is measured as Ground Sampling Distance (GSD), the distance between two consecutive pixel centres measured on the ground in metres. Capella Space is the first US company to launch and operate SAR satellites. ICEYE is currently a constellation of 21 satellites, with plans for expansion to 48 satellites by 2024. The Italian Space Agency (ASI)'s constellation of small satellites for mediterranean basin observation (COSMO-SkyMed) is part of The European Space Agency (ESA) Third Party Missions Programme, in which ESA has an agreement with ASI to distribute data products from the mission. The first-generation COSMO-SkyMED (CSK) satellites consist of four satellites and the second Generation of COSMO-SkyMed (CSG) satellites consist of two satellites (CSG-1 and CSG-2) with sub-1m resolution capabilities and are in the same orbit. The KOMPSAT (Korean Multi-Purpose Satellite) program is part of the Korean government's space development program. Umbra's constellation currently includes eight satellites with additional constellation growth planned.

| Provider      | Sensor                 | Launch date     | Mission status                      | End of Life (EOL) | SAR image mode               | GSD          | Source    |
|---------------|------------------------|-----------------|-------------------------------------|-------------------|------------------------------|--------------|-----------|
| Capella Space | Capella-1 / Denali     | 3 December 2018 | Decayed (decay on 25 January 2023)  | December 2027     | Spotlight; Sliding-spotlight | 25 cm; 50 cm | [133,137] |
| Capella Space | Capella-2 / Sequoia    | 31 August 2020  | Decayed (decay on 28 February 2023) | December 2027     | Spotlight; Sliding-spotlight | 25 cm; 50 cm | [133,137] |
| Capella Space | Capella-3 / Whitney-1  | 24 January 2021 | Decayed (decay on 26 February 2023) | December 2027     | Spotlight; Sliding-spotlight | 25 cm; 50 cm | [133,137] |
| Capella Space | Capella-4 / Whitney-2  | 24 January 2021 | Decayed (8 April 2023)              | December 2027     | Spotlight; Sliding-spotlight | 25 cm; 50 cm | [133,137] |
| Capella Space | Capella-5 / Whitney-3  | 30 June 2021    | Decayed (23 February 2023)          | December 2027     | Spotlight; Sliding-spotlight | 25 cm; 50 cm | [133,137] |
| Capella Space | Capella-6 / Whitney-4  | 15 May 2021     | Operational                         | December 2027     | Spotlight; Sliding-spotlight | 25 cm; 50 cm | [133,137] |
| Capella Space | Capella-7 / Whitney-5  | 13 January 2022 | Decayed (26 August 2023)            | December 2027     | Spotlight; Sliding-spotlight | 25 cm; 50 cm | [133,137] |
| Capella Space | Capella-8 / Whitney-6  | 13 January 2022 | Decayed (6 September 2023)          | December 2027     | Spotlight; Sliding-spotlight | 25 cm; 50 cm | [133,137] |
| Capella Space | Capella-9 / Whitney-7  | 16 March 2023   | Operational                         | December 2027     | Spotlight; Sliding-spotlight | 25 cm; 50 cm | [133,137] |
| Capella Space | Capella-10 / Whitney-8 | 16 March 2023   | Operational                         | December 2027     | Spotlight; Sliding-spotlight | 25 cm; 50 cm | [133,137] |
| Capella Space | Capella-11 / Acadia-1  | 23 August 2023  | Operational                         | December 2027     | Spotlight; Sliding-spotlight | 25 cm; 50 cm | [133,137] |
| Capella Space | Capella-13 / Acadia-3  | Launch date TBD | Planned                             | December 2027     | Spotlight; Sliding-spotlight | 25 cm; 50 cm | [137,138] |

|                               |                                   |                                   |                                                                   |                     |                              |                    |               |
|-------------------------------|-----------------------------------|-----------------------------------|-------------------------------------------------------------------|---------------------|------------------------------|--------------------|---------------|
| Capella Space                 | Capella-14 / Acadia-3             | Launch date<br>TBD                | Planned                                                           | December<br>2027    | Spotlight; Sliding-spotlight | 25 cm; 50 cm       | [137,138]     |
| ICEYE                         | ICEYE                             | 13 January 2018                   | Operational<br>(Nominal). Mission<br>lifetime of >3 years         | December<br>2023    | Spot fine                    | 50 cm              | [133,134]     |
| Italian Space<br>Agency (ASI) | CSK-1                             | 8 June 2007                       | Operational                                                       | >2023               | Spotlight-2A; Spotlight-2    | 30-70 cm; 90<br>cm | [134,139,140] |
| Italian Space<br>Agency (ASI) | CSK-2                             | 9 December<br>2007                | Operational                                                       | >2023               | Spotlight-2A; Spotlight-2    | 30-70 cm; 90<br>cm | [134,139]     |
| Italian Space<br>Agency (ASI) | CSK-3                             | 25 October 2008                   | Operational                                                       | >2023               | Spotlight-2A; Spotlight-2    | 30-70 cm; 90<br>cm | [134,139]     |
| Italian Space<br>Agency (ASI) | CSK-4                             | 6 November<br>2010                | Operational                                                       | >2023               | Spotlight-2A; Spotlight-2    | 30-70 cm; 90<br>cm | [134,139]     |
| Italian Space<br>Agency (ASI) | CSG-1                             | 18 December<br>2019               | Operational.<br>Mission lifetime of<br>7 years and 2<br>prolonged | 31 December<br>2028 | Spotlight-2B; Spotlight-2C   | 60cm; 80 cm        | [133,141–143] |
| Italian Space<br>Agency (ASI) | CSG-2                             | 1 February 2022                   | Operational.<br>Mission lifetime of<br>7 years and 2<br>prolonged | 31 December<br>2028 | Spotlight-2B; Spotlight-2C   | 60cm; 80 cm        | [133,141–143] |
| SI Imaging                    | KOMPSAT-5                         | 22 August 2013                    | Operational<br>(Extended)                                         | December<br>2023    | UH Mode (Spotlight Mode)     | Up to 84 cm        | [134,140]     |
| SI Imaging                    | KOMPSAT-6                         | Expected<br>launch August<br>2024 | Planned                                                           | October 2029        | High resolution A            | 50 cm              | [134,138]     |
| Umbra                         | Umbra SAR-<br>2001 / Umbra-<br>01 | 30 June 2021                      | Operational.<br>Mission lifetime of<br>5 years                    | >2035               | Spotlight                    | 25 cm              | [138,139]     |
| Umbra                         | Umbra-02                          | 13 January 2022                   | Operational                                                       | >2035               | Spotlight                    | 25-400 cm          | [138,139]     |
| Umbra                         | Umbra-03                          | 25 May 2022                       | Operational                                                       | >2035               | Spotlight                    | 25-400 cm          | [138,139]     |
| Umbra                         | Umbra-04                          | 3 January 2023                    | Operational                                                       | >2035               | Spotlight                    | 25-400 cm          | [138,139]     |
| Umbra                         | Umbra-05                          | 3 January 2023                    | Operational                                                       | >2035               | Spotlight                    | 25-400 cm          | [138,139]     |
| Umbra                         | Umbra-06                          | 15 April 2023                     | Operational                                                       | >2035               | Spotlight                    | 25-400 cm          | [138,139]     |
| Umbra                         | Umbra-07                          | 11 November<br>2023               | Operational                                                       | >2035               | Spotlight                    | 25-400 cm          | [138,139]     |
| Umbra                         | Umbra-08                          | 11 November<br>2023               | Operational                                                       | >2035               | Spotlight                    | 25-400 cm          | [138,139]     |

**Table S3.** Comparison of costs between commercial synthetic-aperture radar (SAR) satellites that can detect objects smaller than one metre. The order requirements for tasked and archival imagery differ for each company. Costing is dependent on multiple parameters, including minimum area and whether archival/tasked imagery. Image resolution is measured as Ground Sampling Distance (GSD) for square pixels (i.e., the distance between two consecutive pixel centres measured on the ground in metres) or Maximum Ground Resolution (MGR) for rectangular pixels (measured as azimuth x range). SAR satellites can image in different modes; spotlight and sliding spotlight modes produce higher resolution images. Spotlight imaging is when a beam is focused on a single point of Earth through the acquisition, whereas in sliding spotlight, the acquisition angle is slowly varied to slide the illumination point along the ground to cover a larger area. The Italian Space Agency have Cosmo-Skymed (CSK) and Cosmo Second Generation (CSG) SAR satellites. The UMBRA single-looked product offers shorter dwell times, optimised for very efficient and dense collection, whereas the multi-looked product has longer dwell times to reduce speckle and aid visual interpretation. Umbra SAR satellite constellations are Umbra SAR-2001, Umbra-02, Umbra-03, Umbra-04, Umbra-05 and Umbra-06. Capella Space satellite imagery products are available for purchase from Cloud Earth Observation Services (CLEOS) [144]. ICEYE archive and new tasking products is freely available for scientific research and development activities (see [145] for eligibility requirements and proposal submission).

| Satellite image provider | Sensor                                      | Data type    | Tasking level                      | GSD      | * Price per image (USD) | Minimum order | † Educational discount (%) |
|--------------------------|---------------------------------------------|--------------|------------------------------------|----------|-------------------------|---------------|----------------------------|
| Capella Space            | Capella-1 to Capella-14 (Spotlight)         | Archive data | NA                                 | 25-50 cm | Pricing on request      | 5x5 km        | NA                         |
|                          |                                             | Tasked data  | Routine                            | 25-50 cm | Pricing on request      | 5x5 km        |                            |
|                          |                                             | Tasked data  | 1-Day                              | 25-50 cm | Pricing on request      | 5x5 km        |                            |
|                          |                                             | Tasked data  | 3-Day                              | 25-50 cm | Pricing on request      | 5x5 km        |                            |
|                          |                                             | Tasked data  | 7-Day                              | 25-50 cm | Pricing on request      | 5x5 km        |                            |
|                          | Capella-1 to Capella-14 (Sliding spotlight) | Archive data | NA                                 | 25-50 cm | Pricing on request      | 5x10 km       |                            |
|                          |                                             | Tasked data  | Background (opportunistic tasking) | 25-50 cm | Pricing on request      | 5x10 km       |                            |
|                          |                                             | Tasked data  | Routine                            | 25-50 cm | Pricing on request      | 5x10 km       |                            |

|                                                                  |                                              |              |                                                                       |             |                          |            |                                                                                                                                                                                                                                                                                                                                                                |
|------------------------------------------------------------------|----------------------------------------------|--------------|-----------------------------------------------------------------------|-------------|--------------------------|------------|----------------------------------------------------------------------------------------------------------------------------------------------------------------------------------------------------------------------------------------------------------------------------------------------------------------------------------------------------------------|
|                                                                  |                                              | Tasked data  | 1-Day                                                                 | 25-50 cm    | Pricing on request       | 5x10 km    |                                                                                                                                                                                                                                                                                                                                                                |
|                                                                  |                                              | Tasked data  | 3-Day                                                                 | 25-50 cm    | Pricing on request       | 5x10 km    |                                                                                                                                                                                                                                                                                                                                                                |
|                                                                  |                                              | Tasked data  | 7-Day                                                                 | 25-50 cm    | Pricing on request       | 5 x10 km   |                                                                                                                                                                                                                                                                                                                                                                |
| EADS<br>Astrium<br>and<br>German<br>Aerospace<br>Centre<br>(DLR) | TerraSAR-X<br>(Staring<br>Spotlight<br>mode) | Archive data | NA                                                                    | Up to 25 cm | 2,499                    | 4 x 3.7 km | A limited amount of TerraSAR-X products will be provided to some proposals free of charge and will be delivered electronically, but must meet specific criteria.                                                                                                                                                                                               |
|                                                                  |                                              | Tasked data  | Standard (signed order sent up to 3 days before submission deadline)  | Up to 25 cm | 4,998                    | 4 x 3.7 km | Discounts will be applied for larger order volumes, and for dedicated research programs and institutions contributing to the TerraSAR-X mission, especially by financial or operational support.                                                                                                                                                               |
|                                                                  |                                              | Tasked data  | Fast (signed order sent between 3-1 day before submission deadline)   | Up to 25 cm | 4,998 plus 408 surcharge | 4 x 3.7 km |                                                                                                                                                                                                                                                                                                                                                                |
|                                                                  |                                              | Tasked data  | Urgent (Signed order sent less than 1 day before submission deadline) | Up to 25 cm | 4,998 plus 918 surcharge | 4 x 3.7 km |                                                                                                                                                                                                                                                                                                                                                                |
|                                                                  |                                              |              |                                                                       |             |                          |            |                                                                                                                                                                                                                                                                                                                                                                |
| Italian<br>Space<br>Agency<br>(ASI)                              | CSK<br>(Spotlight-2A)                        | Archive data | NA                                                                    | 30-70 cm    | Pricing on request       | 5 x 7 km   | Price for research and demonstration purposes (non-commercial and non-operational) are \$204/image for archive data and \$816/image for tasking. Results to be shared with e-GEOS and the Italian Space Agency. Orders may be handled with lower priority than commercial orders. Access to 30 cm and 60 cm resolution imagery subject to ad hoc authorisation |
|                                                                  |                                              | Tasked data  | NA                                                                    | 30-70 cm    | Pricing on request       | 5 x 7 km   |                                                                                                                                                                                                                                                                                                                                                                |
|                                                                  |                                              | Archive data | NA                                                                    | 30-70 cm    | Pricing on request       | 3.5 x 7 km |                                                                                                                                                                                                                                                                                                                                                                |
|                                                                  |                                              | Tasked data  | NA                                                                    | 30-70 cm    | Pricing on request       | 3.5 x 7 km |                                                                                                                                                                                                                                                                                                                                                                |
|                                                                  | CSG<br>(Spotlight-2B)                        | Archive data | NA                                                                    | 60 cm       | Pricing on request       | 10 x 10 km |                                                                                                                                                                                                                                                                                                                                                                |
|                                                                  |                                              | Tasked data  | NA                                                                    | 60 cm       | Pricing on request       | 10 x 10 km |                                                                                                                                                                                                                                                                                                                                                                |
|                                                                  | CSK                                          | Archive data | NA                                                                    | 90 cm       | 663                      | 10 x 10 km |                                                                                                                                                                                                                                                                                                                                                                |

|            |                                      |                                            |                       |             |                    |            |                                                                                                                                                                                                                                                                          |
|------------|--------------------------------------|--------------------------------------------|-----------------------|-------------|--------------------|------------|--------------------------------------------------------------------------------------------------------------------------------------------------------------------------------------------------------------------------------------------------------------------------|
|            | (Spotlight-2)                        | Tasked data                                | NA                    | 90 cm       | 4,080              | 10 x 10 km |                                                                                                                                                                                                                                                                          |
|            | CSG-1 and CSG-2 (Spotlight-2)        | Archive data                               | NA                    | 80 cm       | 663                | 5 x 10 km  |                                                                                                                                                                                                                                                                          |
|            | CSG 2C (Spotlight-2)                 | Tasked data                                | NA                    | 80 cm       | 4,080              | 5 x 10 km  |                                                                                                                                                                                                                                                                          |
| ICEYE      | All constellations                   | Spot fine mode                             | NA                    | 50 cm       | Pricing on request | 5x5 m      | Can apply for free imagery through ESA. Some archival imagery available for free (see [145] for further details).<br><br>There is also a limited-access program for university collaborations in the form of discounted data packages with university-focused licensing. |
| Umbra      | All constellations                   | Spotlight mode for tasked and archive data | Single-looked product | 25 cm       | 3,000              | 4x4 m      | No official discount, but open to a discussion with UMBRA regarding user's particular use-case.                                                                                                                                                                          |
|            |                                      |                                            | Single-looked product | 35 cm       | 1,350              | 4x4 m      |                                                                                                                                                                                                                                                                          |
|            |                                      |                                            | Single-looked product | 50 cm       | 750                | 4x4 m      |                                                                                                                                                                                                                                                                          |
|            |                                      |                                            | Multi-looked product  | 25 cm       | 1,350              | 4x4 m      |                                                                                                                                                                                                                                                                          |
|            |                                      |                                            | Multi-looked product  | 35 cm       | 850                | 4x4 m      |                                                                                                                                                                                                                                                                          |
|            |                                      |                                            | Multi-looked product  | 50 cm       | 600                | 4x4 m      |                                                                                                                                                                                                                                                                          |
| SI Imaging | KOMPSAT-5 (UH Mode - Spotlight Mode) | Archive data                               | NA                    | Up to 85 cm | 1,400              | 5x5 km     | An academic discount is available for universities. Must provide a short description of the project to apply for discount.                                                                                                                                               |
|            |                                      | Tasked data                                | Standard              | Up to 85 cm | 2,800              | 5x5 km     |                                                                                                                                                                                                                                                                          |
|            |                                      | Tasked data                                | Priority              | Up to 85 cm | 3,300              | 5x5 km     |                                                                                                                                                                                                                                                                          |

\* Costing is listed in U.S. dollar (USD). Quote provided by satellite image providers in U.S. dollar (USD) for UMBRA and SI Imaging and euros (€) for TerraSAR-X, CSG and CSK satellites. Conversion rate applied: £1.00 = \$1.21 USD and €1.00 = \$1.02 USD. Prices for UMBRA are not inclusive of local tax or import rules, which may apply. All quotes provided in 2023, except TerraSAR-X, CSG and CSK satellites which are based on price listings from e-geos released on 22 February 2021 [140]. For Cosmo-Skymed satellites, imagery is defined as 'archive' 30 days after collection. Access to Cosmo-Skymed 30 cm and 60 cm resolution imagery is subject to ad hoc authorization. TeraSAR-X is sold by the scene, not by the total area of interest.

† Other discounts may be available



**Table S4.** Comparison of costs between commercial satellite companies that provide imagery per square km for a minimum order. Planet provides imagery based on annual subscriptions (see main text for details). Each company has different order requirements for tasked and archival imagery, with the costs dependent on multiple parameters, including minimum area. Image resolution is measured as Ground Sampling Distance (GSD), the distance between two consecutive pixel centres measured on the ground in metres.

| Satellite image provider | Sensor              | ‡ Data type  | Tasking level          | GSD                  | Product (Band)                                                   | * Price per km <sup>2</sup> (USD) | Minimum order      | Minimum width (km) | Standard cloud cover limit (%) | †Educational discount (%) |
|--------------------------|---------------------|--------------|------------------------|----------------------|------------------------------------------------------------------|-----------------------------------|--------------------|--------------------|--------------------------------|---------------------------|
| Airbus                   | Pleiades Neo        | Archive data | NA                     | 30 cm                | Panchromatic                                                     | 18.36                             | 25km <sup>2</sup>  | NA                 | NA                             | NA                        |
| Airbus                   | Pleiades            | Archive data | NA                     | 50 cm                | Panchromatic                                                     | 10.20                             | 25km <sup>2</sup>  | NA                 | NA                             | NA                        |
| Airbus                   | Vision-1            | Archive data | NA                     | 87 cm                | Panchromatic                                                     | 5.14                              | 25km <sup>2</sup>  | NA                 | NA                             | NA                        |
| Airbus                   | Pleiades Neo        | Tasked data  | OnePlan                | 30 cm                | Panchromatic                                                     | 26.52                             | 100km <sup>2</sup> | 5 km               | 10                             | 50                        |
| Airbus                   | Pleiades            | Tasked data  | OnePlan                | 50 cm                | Panchromatic                                                     | 17.34                             | 100km <sup>2</sup> | 5 km               | 10                             | 50                        |
| Airbus                   | Vision-1            | Tasked data  | OnePlan                | 87 cm                | Panchromatic                                                     | 7.87                              | 100km <sup>2</sup> | 5 km               | 10                             | 50                        |
| Airbus                   | Pleiades Neo        | Tasked data  | OnePlan <sup>Pro</sup> | 30 cm                | Panchromatic                                                     | 51.00                             | 100km <sup>2</sup> | 5 km               | 10                             | 50                        |
| Airbus                   | Pleiades            | Tasked data  | OnePlan <sup>Pro</sup> | 50 cm                | Panchromatic                                                     | 31.62                             | 100km <sup>2</sup> | 5 km               | 10                             | 50                        |
| Airbus                   | Vision-1            | Tasked data  | OnePlan <sup>Pro</sup> | 87 cm                | Panchromatic                                                     | 11.80                             | 100km <sup>2</sup> | 5 km               | 10                             | 50                        |
| GEOSAT                   | GEOSAT 2 / Deimos-2 | Archive data | NA                     | 75 cm                | 3-4 band pansharpened                                            | 6.12                              | 25km <sup>2</sup>  | NA                 | 15                             | 45                        |
| GEOSAT                   | GEOSAT 2 / Deimos-2 | Archive data | NA                     | 75 cm (Pan) 3 m (MS) | Panchromatic and multispectral 4 band (B, G, R, NIR) bundle      | 6.12                              | 25km <sup>2</sup>  | NA                 | 15                             | 45                        |
| GEOSAT                   | GEOSAT 2 / Deimos-2 | Archive data | NA                     | 75 cm (Pan) 3 m (MS) | Panchromatic and multispectral 4 band (B, G, R, NIR) stereo-pair | 10.20                             | 25km <sup>2</sup>  | NA                 | 15                             | 45                        |
| GEOSAT                   | GEOSAT 2 / Deimos-2 | Tasked data  | Standard programming   | 75 cm                | 3-4 band pansharpened                                            | 12.24                             | 100km <sup>2</sup> | NA                 | 15                             | 45                        |
| GEOSAT                   | GEOSAT 2 / Deimos-2 | Tasked data  | Standard programming   | 75 cm (Pan) 3 m (MS) | Panchromatic and multispectral 4 band (B, G, R, NIR) bundle      | 12.24                             | 100km <sup>2</sup> | NA                 | 15                             | 45                        |
| GEOSAT                   | GEOSAT 2 / Deimos-2 | Tasked data  | Standard programming   | 75 cm (Pan) 3 m (MS) | Panchromatic and multispectral 4 band (B, G, R, NIR) stereo-pair | 20.40                             | 100km <sup>2</sup> | NA                 | 15                             | 45                        |
| GEOSAT                   | GEOSAT 2 /          | Tasked data  | Priority               | 75 cm                | 3-4 band                                                         | 22.44                             | 100km <sup>2</sup> | NA                 | 15                             | 45                        |

|        |                        |              |                                                                              |                            |                                                                            |       |                    |    |    |    |
|--------|------------------------|--------------|------------------------------------------------------------------------------|----------------------------|----------------------------------------------------------------------------|-------|--------------------|----|----|----|
|        | Deimos-2               |              | Programming<br>(orders placed<br><24 hr prior to<br>acquisition)             |                            | pansharpened                                                               |       |                    |    |    |    |
| GEOSAT | GEOSAT 2 /<br>Deimos-2 | Tasked data  | Priority<br>Programming<br>(orders placed<br><24 hr prior to<br>acquisition) | 75 cm<br>(Pan) 3 m<br>(MS) | Panchromatic and<br>multispectral 4 band<br>(B, G, R, NIR) bundle          | 22.44 | 100km <sup>2</sup> | NA | 15 | 45 |
| GEOSAT | GEOSAT 2 /<br>Deimos-2 | Tasked data  | Priority<br>Programming<br>(orders placed<br><24 hr prior to<br>acquisition) | 75 cm<br>(Pan) 3 m<br>(MS) | Panchromatic and<br>multispectral 4 band<br>(B, G, R, NIR) stereo-<br>pair | 36.72 | 100km <sup>2</sup> | NA | 15 | 45 |
| Maxar  | NA                     | Archive data | NA                                                                           | 50 cm/60<br>cm             | Panchromatic                                                               | 14.00 | 25km <sup>2</sup>  | NA | 15 | 30 |
| Maxar  | NA                     | Archive data | NA                                                                           | 40 cm                      | Panchromatic                                                               | 16.00 | 25km <sup>2</sup>  | NA | 15 | 30 |
| Maxar  | NA                     | Archive data | NA                                                                           | 30 cm                      | Panchromatic                                                               | 19.00 | 25km <sup>2</sup>  | NA | 15 | 30 |
| Maxar  | NA                     | Archive data | NA                                                                           | 50 cm/60<br>cm             | 3-4 band<br>pansharpened                                                   | 17.50 | 25km <sup>2</sup>  | NA | 15 | 30 |
| Maxar  | NA                     | Archive data | NA                                                                           | 40 cm                      | 3-4 band<br>pansharpened                                                   | 19.50 | 25km <sup>2</sup>  | NA | 15 | 30 |
| Maxar  | NA                     | Archive data | NA                                                                           | 30 cm                      | 3-4 band<br>pansharpened                                                   | 22.50 | 25km <sup>2</sup>  | NA | 15 | 30 |
| Maxar  | NA                     | Archive data | NA                                                                           | 50 cm/60<br>cm             | Multispectral 8 band<br>data                                               | 19.00 | 25km <sup>2</sup>  | NA | 15 | 30 |
| Maxar  | NA                     | Archive data | NA                                                                           | 40 cm                      | Multispectral 8 band<br>data                                               | 21.00 | 25km <sup>2</sup>  | NA | 15 | 30 |
| Maxar  | NA                     | Archive data | NA                                                                           | 30 cm                      | Multispectral 8 band<br>data                                               | 24.00 | 25km <sup>2</sup>  | NA | 15 | 30 |
| Maxar  | NA                     | Tasked data  | NA                                                                           | 50 cm/60<br>cm             | Panchromatic                                                               | 24.00 | 100km <sup>2</sup> | NA | 15 | 30 |
| Maxar  | NA                     | Tasked data  | NA                                                                           | 40 cm                      | Panchromatic                                                               | 26.00 | 100km <sup>2</sup> | NA | 15 | 30 |
| Maxar  | NA                     | Tasked data  | NA                                                                           | 30 cm                      | Panchromatic                                                               | 29.00 | 100km <sup>2</sup> | NA | 15 | 30 |
| Maxar  | NA                     | Tasked data  | NA                                                                           | 50 cm/60<br>cm             | 3-4 band<br>pansharpened                                                   | 27.50 | 100km <sup>2</sup> | NA | 15 | 30 |
| Maxar  | NA                     | Tasked data  | NA                                                                           | 40 cm                      | 3-4 band<br>pansharpened                                                   | 29.50 | 100km <sup>2</sup> | NA | 15 | 30 |

|               |                |                  |               |                              |                                                               |       |                    |      |    |    |
|---------------|----------------|------------------|---------------|------------------------------|---------------------------------------------------------------|-------|--------------------|------|----|----|
| Maxar         | NA             | Tasked data      | NA            | 30 cm                        | 3-4 band<br>pansharpened                                      | 32.50 | 100km <sup>2</sup> | NA   | 15 | 30 |
| Maxar         | NA             | Tasked data      | NA            | 50 cm/60<br>cm               | Multispectral 8 band<br>data                                  | 29.00 | 100km <sup>2</sup> | NA   | 15 | 30 |
| Maxar         | NA             | Tasked data      | NA            | 40 cm                        | Multispectral 8 band<br>data                                  | 31.00 | 100km <sup>2</sup> | NA   | 15 | 30 |
| Maxar         | NA             | Tasked data      | NA            | 30 cm                        | Multispectral 8 band<br>data                                  | 34.00 | 100km <sup>2</sup> | NA   | 15 | 30 |
| SI<br>Imaging | KOMPSAT-<br>3A | Archived<br>data | NA            | 40 cm<br>(Pan) 1.6<br>m (MS) | Panchromatic or<br>bundle (panchromatic<br>and multispectral) | 8.00  | 25km <sup>2</sup>  | 5 km | NA | 40 |
| SI<br>Imaging | KOMPSAT-<br>3A | Tasked data      | Standard      | 40 cm<br>(Pan) 1.6<br>m (MS) | Panchromatic or<br>bundle (panchromatic<br>and multispectral) | 18.00 | 100km <sup>2</sup> | 5 km | 10 | 40 |
| SI<br>Imaging | KOMPSAT-<br>3A | Tasked data      | Priority      | 40 cm<br>(Pan) 1.6<br>m (MS) | Panchromatic or<br>bundle (panchromatic<br>and multispectral) | 28.00 | 100km <sup>2</sup> | 5 km | 10 | 40 |
| SI<br>Imaging | KOMPSAT-<br>3A | Tasked data      | Priority plus | 40 cm<br>(Pan) 1.6<br>m (MS) | Panchromatic or<br>bundle (panchromatic<br>and multispectral) | 43.00 | 100km <sup>2</sup> | 5 km | NA | 40 |
| SI<br>Imaging | KOMSAT-3       | Archived<br>data | NA            | 50 cm<br>(Pan) 2 m<br>(MS)   | Panchromatic or<br>bundle (panchromatic<br>and multispectral) | 8.00  | 25km <sup>2</sup>  | 5 km | NA | 40 |
| SI<br>Imaging | KOMSAT-3       | Tasked data      | Standard      | 50 cm<br>(Pan) 2 m<br>(MS)   | Panchromatic or<br>bundle (panchromatic<br>and multispectral) | 16.00 | 100km <sup>2</sup> | 5 km | 10 | 40 |
| SI<br>Imaging | KOMSAT-3       | Tasked data      | Priority      | 50 cm<br>(Pan) 2 m<br>(MS)   | Panchromatic or<br>bundle (panchromatic<br>and multispectral) | 26.00 | 100km <sup>2</sup> | 5 km | 10 | 40 |
| SI<br>Imaging | KOMSAT-3       | Tasked data      | Priority plus | 50 cm<br>(Pan) 2 m<br>(MS)   | Panchromatic or<br>bundle (panchromatic<br>and multispectral) | 40.00 | 100km <sup>2</sup> | 5 km | NA | 40 |

\* Costing is listed in U.S. dollar (USD). Quote provided by satellite image providers in U.S. dollar (USD) for SI imaging and Maxar and euros (€) for Airbus and GEOSAT. Conversion rate applied: €1.00 = \$1.02 USD. All quotes provided in 2022, except GEOSAT satellites, which are based on price listings from e-geos released on 22 February 2021 [140]. All prices for GEOSAT-2/Deimos-2 refer to up to 5 single user licences and academic user licences are available for universities and research entities.

† Other discounts may be available

‡ To qualify for archive pricing, imagery must be at least 7 days old for GEOSAT-2/Deimos-2. For Airbus, archive prices apply as soon as the data is available in the Airbus imagery catalogue.

**Table S5.** Examples of successful crowdsourcing campaigns to estimate population size of wildlife on land using VHR satellite remote sensing (SRS) and unoccupied aircraft systems (UAS). The campaigns are listed in order of release date, with references (see [40, 146-154]) in a separate column. The platform Tomnod has been replaced by GeoHIVE.

| Crowdsourcing Campaign          | Species                              | Program initiated | Remote sensing method | Tile size                        | Resolution                      | Animal location | Platform      | Number of participants                                   | Data type                  | Reference     |
|---------------------------------|--------------------------------------|-------------------|-----------------------|----------------------------------|---------------------------------|-----------------|---------------|----------------------------------------------------------|----------------------------|---------------|
| SAVMAP campaign 2014            | Large mammals in African savanna     | 2014              | UAS                   | 320 x 240 m                      | 8 cm                            | Land            | MicroMappe rs | 232                                                      | Count                      | [146]         |
| Satellites Over Seals (SOS)     | Weddell seal                         | 2016              | SRS                   | 500 x 500 m                      | 31-60 cm, depending on campaign | Ice             | Tomnod        | 5,000 to 241,478 depending on campaign                   | Presence/Absence and count | [40, 147–149] |
| Satellites Over Seals (SOS)     | Crabeater seal                       | 2019              | SRS                   | 500 x 500 m                      | ~31-50 cm                       | Ice             | Tomnod        | 2,225                                                    | Presence/Absence           | [150]         |
| Año Nuevo Island – Animal Count | Various seals and sea lions          | 2019              | UAS                   | 700 x 700 pixel                  |                                 | Land            | Zooiverse     | >1,500                                                   | Count                      | [151]         |
| Walrus From Space               | Walrus                               | 2021              | SRS                   | 500 x 500 m                      | 31-50 cm                        | Haul-out        | GeoHIVE       | >11,000 in first campaign. Additional campaigns ongoing. | Presence/Absence           | [152]         |
| Drones for Ducks                | Ducks, geese, cranes and other birds | 2022              | UAS                   | 2.56 x 3.42 m to 10.24 x 13.68 m | 0.5 – 2 cm                      | Wetland         | Zooiverse     | Ongoing (5,732 up to 15 November 2023)                   | Count                      | [153]         |
| Albatrosses From Space          | Wandering albatross                  | 2022              | SRS                   | 160 x 160 m                      | 31 cm                           | Breeding ground | GeoHIVE       | 639                                                      | Count                      | [154]         |
